# Supplementary material
Source: publisher site journal article supplement (https://www.dovepress.com/article/313387)
Supplement: Supplementary file 1 [file get_supplementary_file.php]

## **1. Supplementary Figure-1: Information sheet for participant**

We would like to conduct a medical research entitled “*High Rate of Bacterial Contamination on Healthcare Worker’s Mobile Phone and Potential role in Dissemination of Healthcare-Associated Infection at Debre Berhan Referral Hospital, North Shoa Zone, Ethiopia.*” We are requesting you to voluntarily participate in this study. We are going to inform you about the purpose, responsibility of investigators or data collectors to keep confidentiality and how we are going to use the data.

### **Description and purpose of the study**

Mobile Phones (MPs) handling by healthcare workers (HCWs) in hospitals is an open breeding place for the transmission of bacteria and healthcare-associated infections (HCAIs). However, there has been no investigation of such kind of research in this study area. Therefore this study aims to determine bacterial contamination of MPs of HCWs and potential role in the dissemination of HCAIs. Also, it aims to examine the prevalence of antibiotic-resistant bacteria on MPs of HCWs.

### **Procedures**

If you agree to participate in this study and you sign the consent form, the following will be done:

- You will have interview with us for some time about risk factors for bacterial contamination of the MPs, and
- We will take swab sample from your mobile phone.

### **Risks and discomforts**

We don’t take any biological sample from you. Discomforts will not happen. During all sample collection we will follow standard operational procedures.

### **Benefits**

This study may not benefit you directly. The findings from this study will be useful for HCWs to have awareness about potential bacterial contamination of MPs and should clean their MPs after use and wash their hands before and after handling patients in the health care settings. It also used for local and national authorities to develop and implement the mobile use guideline in healthcare settings.

### **Compensation**

You will not be offered payment for being in this study.

### **Costs**

We expect that there will be no extra cost to you because of participation in the research but if there is any, this will be compensated by the project.

## Confidentiality

We respect your privacy and confidentiality. Your study records will be identified by a subject identification number and not by your name. Any information that identifies you will not be shared with anyone else. You have the right to refuse your participation in this study. You can stop to participate in the study at any time after giving your consent. This decision will not affect in any way your current or future medical care or any other benefits.

## 2. Supplementary Figure-2: Participant Consent Form

Participant Full Name \_\_\_\_\_

1. I understood the purpose of the study entitled “*High Rate of Bacterial Contamination on Healthcare Worker’s Mobile Phone and Potential role in Dissemination of Healthcare-Associated Infection at Debre Berhan Referral Hospital, North Shoa Zone, Ethiopia.*”
2. I agree to collect samples from my mobile phone.
3. I understand that the information will be confidential.
4. I understand that I can refuse to participate in the study
5. I understand that I can stop the study at any time.
6. I understand that if I don’t want to take part, it will not affect my current and future medical services.
7. I understand that if I refuse/stop to participate in the study, it will not affect my current and future medical services.
8. I agree that there is no direct benefit.

Agree  Do not agree

Therefore I give my consent freely to voluntary participate in this study.

Participant Name \_\_\_\_\_ Signature \_\_\_\_\_ Date \_\_\_\_\_

Interviewer’s Name \_\_\_\_\_ Signature \_\_\_\_\_ Date \_\_\_\_\_

Witnesses

1. Name \_\_\_\_\_ Signature \_\_\_\_\_ Date \_\_\_\_\_

2. Name \_\_\_\_\_ Signature \_\_\_\_\_ Date \_\_\_\_\_

### 3. Supplementary Figure-3: Self-Administered Questionnaire

Code number \_\_\_\_\_

We thank gratefully for your agreement to participate in this study. Now we are going to undertake interview with you for a few minuet. The interview is about general socio demographic characteristics and risk factor related to mobile phone contamination. The information you give us is very essential for this study. Therefore we politely ask you to give us the right response.

#### Socio Demographic Data

1. Age \_\_\_\_\_
2. Sex:
  - A. Male
  - B. Female
3. Working Place
  - A. ICUs
  - B. Pediatric ward
  - C. Surgical ward
  - D. Gynecology ward
  - E. Emergency ward
  - F. Laboratory rooms.
4. Profession
  - A. Medical Doctor
  - B. Nurse
  - C. Medical Laboratory
  - D. Others
5. Frequent Hand Washing
  - A. Yes
  - B. No
6. Regular MP Disinfection
  - A. Yes
  - B. No
7. Service Year
  - A. 1-5 years
  - B. 6-10 years
  - C. >10 years

Name of the interviewer \_\_\_\_\_

Sign \_\_\_\_\_

Date \_\_\_\_\_
